# Supplementary material for: Prognostic value of histopathology and trends in cervical cancer: a SEER population study
Source: PubMed Central journal article supplement (PMC1994954; doi:10.1186/1471-2407-7-164), 2007-08-23
Supplement: 1471-2407-7-164-S1.pdf [file 1471-2407-7-164-S1.pdf]

## Additional file 1 - Check of proportional hazards for the manuscript's models of Tables 3-4

Figures are rho-values, correlation between residuals and survival time. Rho-values close to 0 indicate less departure from proportional hazards, whereas 1 is the theoretical maximum departure.

| Variable                       | Model 3   | Model 4-A | Model 4-B |
|--------------------------------|-----------|-----------|-----------|
| <b>Demographics</b>            |           |           |           |
| SEER area                      |           |           |           |
| Central registries             | -0.009    | –         | –         |
| Western registries             | -0.013    | –         | –         |
| Age at diagnosis               | -0.093 ** | –         | –         |
| Year of diagnosis              | 0.014     | 0.004     | -0.009    |
| African-American               | 0.009     | 0.103 *   | 0.099     |
| Marital status (married)       | 0.059 **  | –         | –         |
| <b>Pathology</b>               |           |           |           |
| Histology                      |           |           |           |
| SCC microinvasive              | 0.018     | 0.053     | 0.072     |
| Carcinoma NOS                  | -0.066 ** | 0.096     | 0.062     |
| Adeno. excl. muc.              | 0.018     | 0.148 **  | 0.144 **  |
| Adenosquamous                  | -0.007    | 0.045     | 0.060     |
| Mucinous                       | 0.026 *   | 0.090     | 0.064     |
| Small cell                     | -0.021    | -0.006    | -0.013    |
| High grade                     | 0.009     | -0.089    | -0.105 *  |
| Log tumor size                 | –         | -0.118 *  | –         |
| Log odds nodal involvement     | –         | 0.026     | –         |
| <b>Stage</b>                   |           |           |           |
| Localized                      | 0.119 **  | –         | -0.098    |
| Stage II                       | –         | -0.006    | –         |
| Stage III                      | –         | 0.100 *   | –         |
| Stage IV                       | –         | 0.023     | –         |
| <b>Treatments-interactions</b> |           |           |           |
| Hysterectomy (HRT)             | 0.121 **  | 0.121 *   | 0.212 **  |
| Radiotherapy (RT)              | 0.178 **  | –         | –         |
| HRT * RT                       | -0.076 ** | –         | –         |
| High grade * RT                | -0.026 *  | –         | –         |
| Localized * HRT                | -0.056 ** | –         | –         |
| Localized * RT                 | -0.069 ** | –         | –         |
| Localized * HRT * RT           | 0.031 **  | –         | –         |

\*  $P \leq 0.05$ ; \*\*  $P \leq 0.01$ ; – variable not in model.
