# Supplementary material for: Prognostic value of histopathology and trends in cervical cancer: a SEER population study
Source: PubMed Central journal article supplement (PMC1994954; doi:10.1186/1471-2407-7-164), 2007-08-23

## Additional file 2 - Functional forms of the effect of continuous variables on cause-specific mortality

The functional forms were computed from the manuscript's models of Table 3 (left graphs) and Table 4-A (right graphs). Dotted lines: 95% pointwise confidence interval.

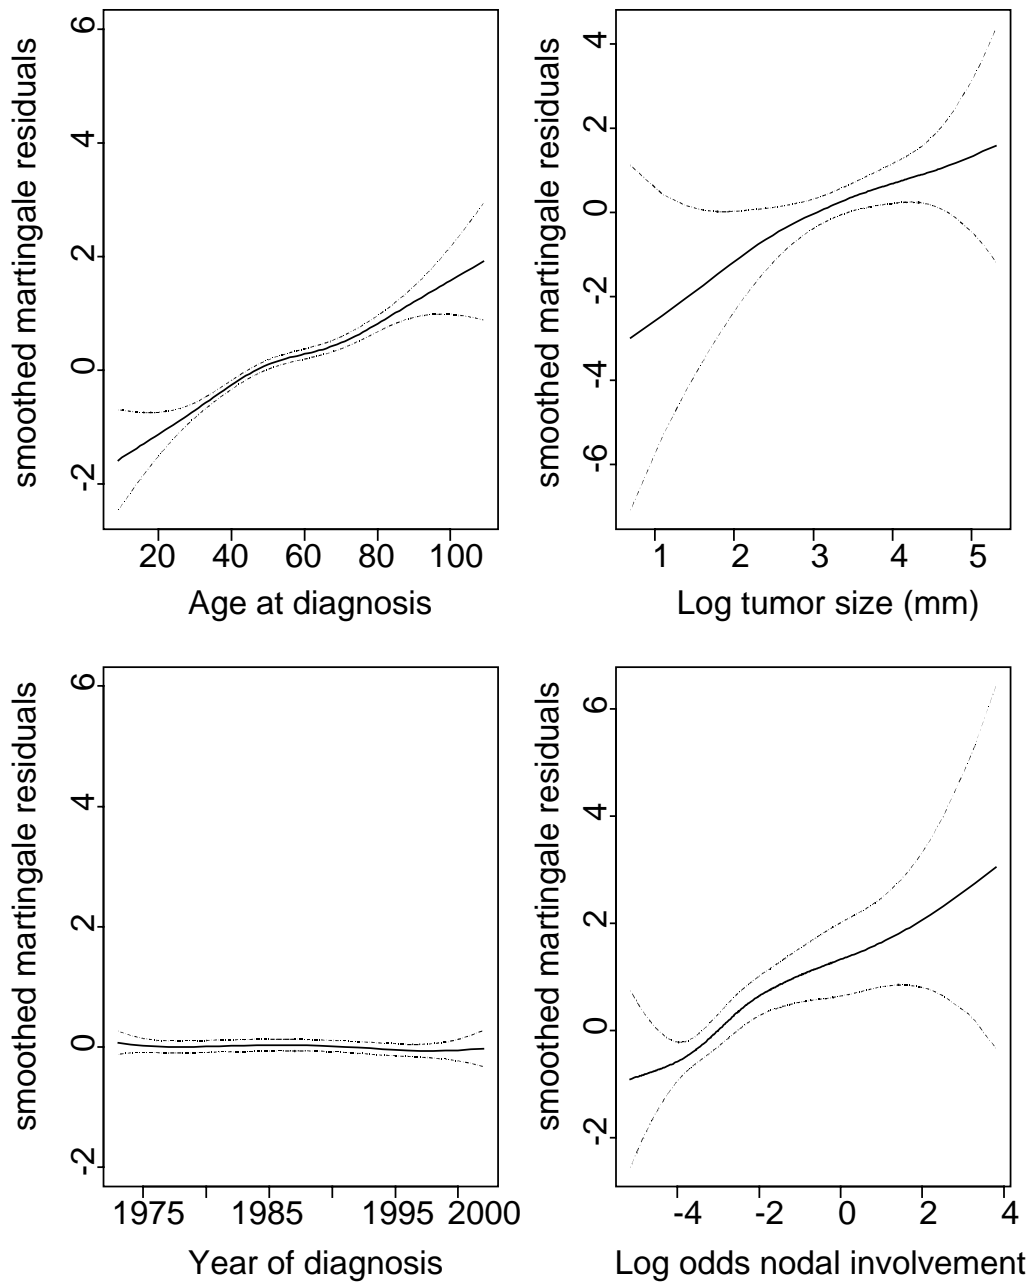

Supplement: 1471-2407-7-164-S2.pdf [file 1471-2407-7-164-S2.pdf]
