# Supplementary material for: Prognostic value of histopathology and trends in cervical cancer: a SEER population study
Source: PubMed Central journal article supplement (PMC1994954; doi:10.1186/1471-2407-7-164), 2007-08-23
Supplement: 1471-2407-7-164-S3.pdf [file 1471-2407-7-164-S3.pdf]

### Additional file 3 - Multivariate analysis of 30,989 cases of invasive cancer of the cervix: overall and cause-specific mortality

Results according to the overall and cause-specific mortality endpoints. The hazard ratios are globally comparable; only the cause-specific sub-table is reported in the manuscript.

| Variable                                  | A                                                        |        | B                                                        |        |
|-------------------------------------------|----------------------------------------------------------|--------|----------------------------------------------------------|--------|
|                                           | Overall Mortality                                        |        | Cause-Specific Mortality                                 |        |
|                                           | Hazard ratio <sup>(3)</sup><br>(95% confidence interval) | P      | Hazard ratio <sup>(3)</sup><br>(95% confidence interval) | P      |
| <b>Demographic characteristics</b>        |                                                          |        |                                                          |        |
| SEER area                                 |                                                          |        |                                                          |        |
| Central registries                        | 0.93 (0.88-0.96)                                         | 0.001  | 0.95 (0.89-1.01)                                         | 0.099  |
| Western registries                        | 0.92 (0.88-0.95)                                         | <0.001 | 0.97 (0.91-1.03)                                         | 0.308  |
| Age at diagnosis                          | 1.03 (1.03-1.03)                                         | <0.001 | 1.01 (1.00-1.01)                                         | <0.001 |
| Year of diagnosis                         | 1.01 (1.00-1.00)                                         | <0.001 | 1.00 (1.00-1.01)                                         | 0.013  |
| African-American ethnicity <sup>(1)</sup> | 1.18 (1.12-1.23)                                         | <0.001 | 1.14 (1.07-1.22)                                         | <0.001 |
| Marital status (married) <sup>(1)</sup>   | 0.93 (0.89-0.96)                                         | <0.001 | 0.99 (0.94-1.04)                                         | 0.638  |
| <b>Pathology</b>                          |                                                          |        |                                                          |        |
| Histological type <sup>(2)</sup>          |                                                          | <0.001 |                                                          | <0.001 |
| SCC microinvasive                         | 0.84 (0.75-0.93)                                         | 0.001  | 0.28 (0.20-0.39)                                         | <0.001 |
| Carcinoma not otherwise specified         | 0.95 (0.87-1.03)                                         | 0.219  | 0.91 (0.79-1.04)                                         | 0.168  |
| Adenocarcinoma excl. mucinous             | 1.08 (1.02-1.14)                                         | 0.006  | 1.06 (0.98-1.15)                                         | 0.126  |
| Adenosquamous carcinoma                   | 1.28 (1.17-1.40)                                         | <0.001 | 1.35 (1.20-1.51)                                         | <0.001 |
| Mucinous                                  | 1.37 (1.16-1.59)                                         | <0.001 | 1.52 (1.23-1.88)                                         | <0.001 |
| Small cell                                | 1.66 (1.39-1.96)                                         | <0.001 | 1.94 (1.58-2.39)                                         | <0.001 |
| Histological High grade <sup>(1)</sup>    | 1.61 (1.48-1.74)                                         | <0.001 | 2.17 (1.93-2.44)                                         | <0.001 |
| Localized stage <sup>(1)</sup>            | 0.22 (0.20-0.23)                                         | <0.001 | 0.07 (0.05-0.08)                                         | <0.001 |
| <b>Treatments and interactions</b>        |                                                          |        |                                                          |        |
| Hysterectomy (HRT) <sup>(1)</sup>         | 0.34 (0.29-0.38)                                         | <0.001 | 0.26 (0.21-0.31)                                         | <0.001 |
| Radiotherapy (RT) <sup>(1)</sup>          | 0.86 (0.80-0.92)                                         | <0.001 | 1.01 (0.92-1.11)                                         | 0.810  |
| HRT * RT                                  | 1.86 (1.59-2.17)                                         | <0.001 | 2.05 (1.67-2.52)                                         | <0.001 |
| High grade * RT                           | 0.75 (0.68-0.81)                                         | <0.001 | 0.60 (0.53-0.69)                                         | <0.001 |
| Localized stage * HRT                     | 1.51 (1.27-1.77)                                         | <0.001 | 2.87 (2.17-3.78)                                         | <0.001 |
| Localized stage * RT                      | 2.50 (2.27-2.73)                                         | <0.001 | 5.24 (4.36-6.29)                                         | <0.001 |
| Localized stage * HRT * RT                | 0.58 (0.46-0.72)                                         | <0.001 | 0.40 (0.28-0.56)                                         | <0.001 |

<sup>(1)</sup> Binarized variable, coded 1, versus all other levels of the variable including missing.

<sup>(2)</sup> Reference level = non-microinvasive squamous cell carcinoma (SCC).

<sup>(3)</sup> Hazard ratio >1 indicates increased risk of death.
